# Supplementary material for: Jasmonicacid–elicited volatiles in wheat mediate pink stem borer suppression and parasitoid attraction
Source: Research Square preprint supplement (doi:10.21203/rs.3.rs-7638087/v1), 2025-10-06

**Table S1.** Incidence of “dead heart” symptoms (%) caused by pink stem borer in wheat, as influenced by foliar application of elicitors (treatments T1–T9) across two winter seasons (2021–22 & 2022–23) and multiple observation periods (42–63 DAS).

| Treatment | Per cent dead heart symptom* | | | | Mean | % Reduction |
| --- | --- | --- | --- | --- | --- | --- |
| 42  DAS | 49  DAS | 56  DAS | 63  DAS |
| Salicylic acid 8 mM | 4.35**bcd** | 4.53**bcd** | 4.70**bcd** | 3.97**bcd** | 4.39**bcd** | 19.15 |
| Salicylic acid 16 mM | 4.43**bc** | 4.33**bc** | 4.77**bc** | 3.48**bc** | 4.26**bc** | 21.55 |
| Methyl salicylate 8 mM | 4.84**cde** | 4.72**cde** | 4.76**cde** | 3.98**cde** | 4.58**cde** | 15.65 |
| Methyl salicylate 16 mM | 4.66**bcd** | 4.57**bcd** | 4.86**bcd** | 3.67**bcd** | 4.44**bcd** | 18.23 |
| Jasmonic acid 2.5 mM | 3.88**ab** | 4.26**ab** | 4.33**ab** | 3.71**ab** | 4.05**ab** | 25.41 |
| Jasmonic acid 5 mM | 3.60**a** | 4.02**a** | 3.98**a** | 3.20**a** | 3.71**a** | 31.68 |
| Chitosan 2.5 mM | 4.99**de** | 5.09**de** | 5.35**de** | 4.39**de** | 4.96**de** | 8.66 |
| Chitosan 5 mM | 4.85**ef** | 5.00**ef** | 5.39**ef** | 4.51**ef** | 4.94**ef** | 9.02 |
| Control | 5.38**f** | 5.56**f** | 5.95**f** | 4.84**f** | 5.43**f** | - |
| SE(d) | 0.13 | 0.10 | 0.10 | 0.11 | 0.03 | - |
| CD (P<0.0.025,0.017,  0.018,0.052,0.000) | 0.39 | 0.28 | 0.28 | 0.33 | 0.08 | - |

*Data represent mean values of three replications; Data on dead heart were subject to ANOVA after arcsine transformation; DAS: Days after sowing; mM: Millimolar; In a column, means followed by same letter(s) are not significantly different by Tukey’s HSD, α = 0.05.

**Table S2.** Incidence of “white ear” symptoms (%) caused by pink stem borer in wheat, as influenced by foliar application of elicitors (treatments T1–T9) across two winter seasons (2021–22 & 2022–23) and multiple observation periods (73–90 DAS).

| Main/sub/sub-sub plots | Per cent white ear symptom* | | | Mean | % Reduction | Yield (grain kg/ha) | % Increase |
| --- | --- | --- | --- | --- | --- | --- | --- |
| 73  DAS | 83  DAS | 90  DAS |
| Treatment (Sub-plot) | | | | | | | |
| Salicylic acid 8 mM | 3.96**b** | 6.81**b** | 7.48**b** | 6.08**b** | 20.11 | 3687.33**d** | 8.10 |
| Salicylic acid 16 mM | 3.86**ab** | 6.44**ab** | 7.10**ab** | 5.80**ab** | 23.78 | 3877.78**b** | 12.62 |
| Methyl salicylate 8 mM | 4.60**bc** | 6.95**bc** | 7.25**bc** | 6.27**bc** | 17.61 | 3648.72**e** | 7.13 |
| Methyl salicylate 16 mM | 4.02**ab** | 6.83**ab** | 7.23**ab** | 6.03**ab** | 20.76 | 3851.89**c** | 12.03 |
| Jasmonic acid 2.5 mM | 3.75**ab** | 6.56**ab** | 7.24**ab** | 5.85**ab** | 23.13 | 3872.22**b** | 12.49 |
| Jasmonic acid 5 mM | 3.64**a** | 6.23**a** | 6.60**a** | 5.49**a** | 27.86 | 4763.75**a** | 28.87 |
| Chitosan 2.5 mM | 4.86**d** | 7.61**d** | 8.10**d** | 6.86**d** | 9.86 | 3561.11**g** | 4.85 |
| Chitosan 5 mM | 4.95**cd** | 7.52**cd** | 8.06**cd** | 6.84**cd** | 10.12 | 3605.56**f** | 6.02 |
| Control | 5.41**e** | 8.50**e** | 8.93**e** | 7.61**e** | - | 3388.49**h** | - |
| SE(d) | 0.10 | 0.10 | 0.10 | 0.02 | - | 0.01 | - |
| CD (P<0.029,0.001,0.000) | 0.27 | 0.23 | 0.24 | 0.07 | - | 0.01 | - |

*Data represent mean values of three replications; Data on dead heart were subject to ANOVA after arcsine transformation; DAS: Days after sowing; mM: Millimolar; In a column, means followed by same letter(s) are not significantly different by Tukey’s HSD, α = 0.05.

**Table S3**. List of organic volatile compounds, emitted by healthy wheat pot plants; wheat pot plants infested with 3rd instar pink stem borer larvae and wheat plants with foliar application of JA; *Means of three replications; In a column, means followed by the same letter(s) do not differ significantly from each other by Tukey’s HSD test (α = 0.05). Per cent occupied by volatiles in all three profiles were subject to statistical analysis after applying arcsine transformation.

| **S. No.** | **Compound name** | **Molecular formula** | **Wheat healthy** | **% Area** | **Wh + PSB** | **% Area** | **Wh + JA** | **% Area** |
| --- | --- | --- | --- | --- | --- | --- | --- | --- |
| **1.** | 1-Hexen-4-yne, 3-ethylidene-2-methyl- | C9H12 | √ | 2.20**g**  ±0.63 | - | 0**n** | **-** | 0**k** |
| **2.** | Azulene | C10H8 | - | 0**j** | - | 0**n** | √ | 0.78**j**  ±0.50 |
| **3.** | Octadecane,5-methyl- | C19H40 | √ | 0.93**i**  ±0.50 | √ | 0.76**m**  ±0.59 | √√ | 4.21**def**  ±0.50 |
| **4.** | 5,5-Diethylpentadecane | C19H40 | - | 0 | - | 0**n** | √ | 0.77**j**  ±0.44 |
| **5.** | 1-Nonadecene | C19H38 | - | 0**j** | √ | 5.50**ef**  ±0.50 | √ | 0.57**j**  ±0.44 |
| **6.** | Eicosane, 2,4-dimethyl- | C22H46 | - | 0**j** | √ | 1.15**kl**  ±0.50 | - | 0**k** |
| **7.** | Tetracosane | C24H50 |  | 0**j** | √ | 3.37**i**  ±0.44 | √√√ | 4.69**d**  ±0.50 |
| **8.** | 2,5-Cyclohexadiene-1,4-dione, 2,6-bis(1,1-dimethyl | C14H20O2 | √ | 1.85**gh**  ±0.50 | - | 0**n** | **-** | 0**k** |
| **9.** | Benzaldehyde, 3-ethoxy-4-propoxy- | C12H16O3 | √ | 3.07**f**  ±0.44 | - | 0**n** | **-** | 0**k** |
| **10.** | 1-dodecanol | C12H26O | - | 0**j** | √ | 0.78**lm**  ±0.44 | √√ | 3.23**g**  ±0.63 |
| **11.** | Methyl 4-tert-butylbenzoate | C12H16O2 | - | 0**j** | √ | 1.33**jk**  ±0.50 | - | 0**k** |
| **12.** | Phenol, 2,6-bis(1,1-dimethylethyl)- | C14H22O | √ | 3.53**f**  ±0.44 | √ | 6.70**d**  ±0.63 | √ | 4.53**de**  ±0.50 |
| **13.** | 2-Butenedioic acid (Z)-, monododecyl ester | C16H28O4 | √ | 1.62**h**  ±0.50 | √√ | 8.28**c**  ±0.50 | √ | 3.66**efg**  ±0.50 |
| **14.** | Benzenedicarboxylic acid, bis(2-methylpropyl) | C16H22O4 | √ | 9.07**d**  ±0.63 | √ | 4.04**hi**  ±0.50 | √ | 11.11**a**  ±0.44 |
| **15.** | n-hexadecanoic acid | C16H32O2 | - | 0**j** | √ | 5.18**f**  ±0.44 | √ | 3.46**fg**  ±0.44 |
| **16.** | Oxirane, hexadecyl- | C19H36O3 | - | 0**j** | √√ | 11.0**b**  ±0.44 | √√ | 9.80**a**  ±0.50 |
| **17.** | Methyl stearate | C19H38O2 | - | 0**j** | √ | 1.61**ij**  ±0.50 | √ | 1.26**i**  ±0.63 |
| **18.** | Carbonic acid, decylnonyl ester | C20H40O3 | - | 0**j** | √√ | 4.86**fgh**  ±0.63 | √√ | 3.40**fg**  ±0.50 |
| **19.** | Malonicacid, dodecyl 4-methylpent-2-yl ester | C21H42O2 | - | 0**j** | - | 0**n** | √ | 2.98**g**  ±0.50 |
| **20.** | Eicosanoic acid, methyl ester | C21H42O2 | - | 0**j** | √ | 6.30**de**  ±0.50 | √ | 5.99**c**  ±0.44 |
| **21.** | 1-pentacosanol | C25H52O | - | 0**j** | √ | 4.16**gh**  ±0.50 | - | 0**k** |
| **22.** | 2-(3-Hydroxyprop-1-yn-1-yl)benzonitrile | C10H7NO | √ | 6.92**e**  ±0.50 | **-** | 0**n** | **-** | 0**k** |
| **23.** | 4-Nitro-5,6,7,8-tetrahydronaphthalen-1-ol | C10H11NO3 | - | 0**j** | √ | 7.85**c**  ±0.44 | √ | 6.03**c**  ±0.43 |
| **24.** | trans-2-Dodecen-1-ol, trifluoroacetate | C14H23F3O2 | √ | 2.24**g**  ±0.50 | **-** | 0**n** | **-** | 0**k** |
| **25.** | cis-1-Chloro-9-octadecene | C18H35Cl | √ | 11.73**c**  ±0.44 | **-** | 0**n** | **-** | 0**k** |
| **26.** | Heptafluorobutyric acid, n-tetradecyl ester | C18H29F7O2 | - | 0**j** | - | 0**n** | √ | 6.38**c**  ±0.50 |
| **27.** | 4-(4,7-Dimethoxy-2H-1,3-benzodioxol-5-yl)-1,3-dimethyl-4H,5H,7H-pyrazolo[3,4-b]pyridin-6-one | C17H19N3O5 | √ | 16.75**b**  ±0.44 | **-** | 0**n** | **-** | 0**k** |
| **28.** | 3,5-dimethyl-pyrazol-1-yl)-[1,2,5]oxadiazolo | C17H17N7O | √ | 40.08**a**  ±0.50 | **-** | 0**n** | **-** | 0**k** |
| **29.** | Nonadecylheptafluorobutyrate | C23H39F7O2 | - | 0**j** | √ | 4.72**fgh**  ±0.44 | √√ | 7.83**b**  ±0.63 |
| **30.** | Eicosylheptafluorobutyrate | C24H41F7O2 | - | 0**j** | - | 0**n** | √ | 3.62**fg**  ±0.50 |
| **31.** | Docosylheptafluorobutyrate | C26H45F7O2 | - | 0**j** | - | 0**n** | √ | 2.13**h**  ±0.50 |
| **32.** | 1,2-Oxathiane, 6-dodecyl-, 2,2-dioxide | C16H32O3S | - | 0**j** | √ | 4.89**fg**  ±0.44 | - | 0**k** |
| **33.** | (3-Nitro-phenoxy)-acetic acid pyridin-2-ylmethylene-hydrazide | C14H12N4O4 | - | 0**j** | √ | 17.51**a**  ±0.50 | - | 0**k** |
| SE(d) | | | | 0.439 | - | 4.178 | - | 0.631 |
| CD (P<0.0001) | | | | 1.166 | - | 11.097 | - | 1.676 |

Wh: Wheat; JA: Jasmonic acid

**Table S4.** Per cent parasitization of *T*. *chilonis* on eggs of *Corcyra*, as influenced by selected hydrocarbons induced by pink stem borer feeding and foliar application of JA in wheat pot plants; *Mean of six replications; In a column, values followed by the same letter(s) do not differ significantly from each other by Tukey’s HSD test (α = 0.05); DAI: Days after inoculation

| **S. No.** | **Compounds** | **% parasitization at*** | | |
| --- | --- | --- | --- | --- |
| **3 DAI** | **5 DAI** | **7 DAI** |
| 1. | Octadecane | 17.0**b** | 73.5**c** | 90.4**b** |
| 2. | 1-Nonadecene | 13.5**d** | 31.4**d** | 32.3**d** |
| 3. | Eicosane | 18.1**a** | 78.5**a** | 91.8**a** |
| 4. | n-Hexadecanoic acid | 18.8**a** | 75.8**b** | 89.4**c** |
| 5. | Hexane washed eggs | 15.1**c** | 28.2**e** | 25.3**e** |
| 6. | Untreated control eggs | 18.4**a** | 75.4**b** | 90.2**b** |
| SE(d) | | 0.303 | 0.243 | 0.341 |
| CD (P<0.0001) | | 0.925 | 0.742 | 1.041 |

**Table S5.** Per cent parasitization of *Trichogramma chilonis* on eggs of *Corcyra*, as influenced by selected hydrocarbons induced by pink stem borer feeding and foliar application of JA in wheat pot plants; *Mean of six replications; In a column, values followed by the same letter(s) do not differ significantly from each other by Tukey’s HSD test (α = 0.05); DAI: Days after inoculation

| **S. No.** | **Compounds** | **% parasitization at** | | |
| --- | --- | --- | --- | --- |
| **3 DAI** | **5 DAI** | **7 DAI** |
| 1. | Octadecane | 18.4**a** | 74.2**a** | 92.5**b** |
| 2. | 1-Nonadecane | 12.5**b** | 30.2**c** | 31.7**e** |
| 3. | Eicosane | 18.5**a** | 74.3**a** | 82.5**d** |
| 4. | n-Hexadecanoic acid | 19.2**a** | 72.6**b** | 90.4**c** |
| 5. | Hexane washed eggs | 13.2**a** | 24.0**d** | 28.1**f** |
| 6. | Untreated control eggs | 18.3**b** | 73.2**b** | 94.5**a** |
| SE(d) | | 0.306 | 0.254 | 0.361 |
| CD (P<0.0001) | | 0.936 | 0.777 | 1.104 |

**Figure S1. Chromatogram and volatiles deducted in healthy wheat seedlings**


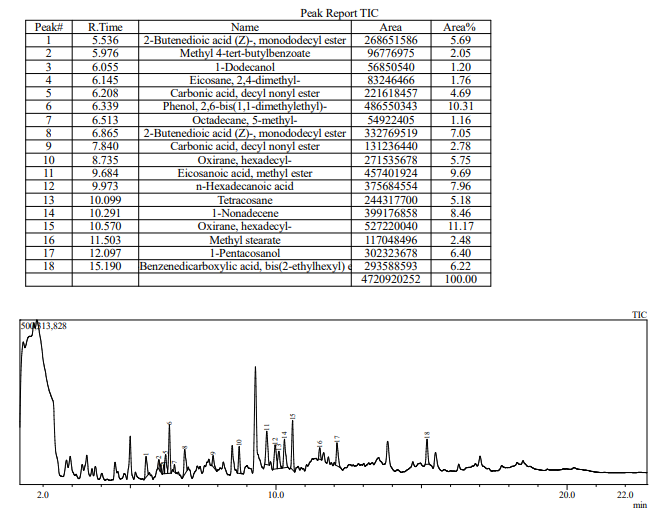


**Figure S2. Chromatogram and volatiles deducted in wheat seedlings induced by pink stem borer**
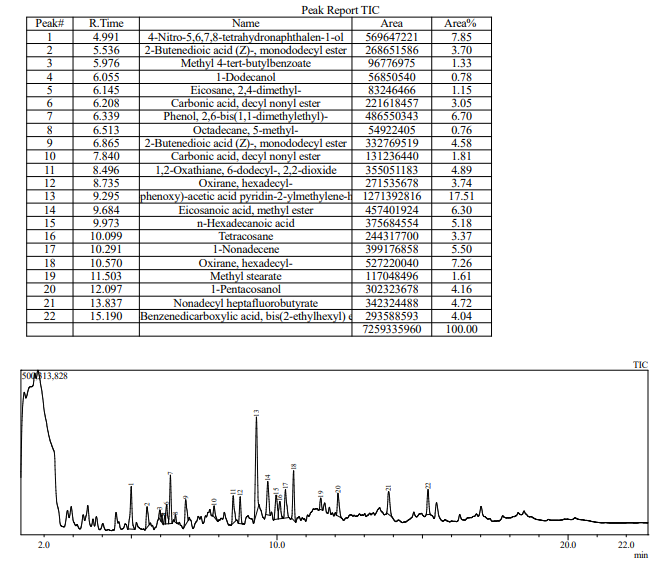


**Figure S3. Chromatogram and volatiles deducted in wheat seedlings induced by exogenous JH application**


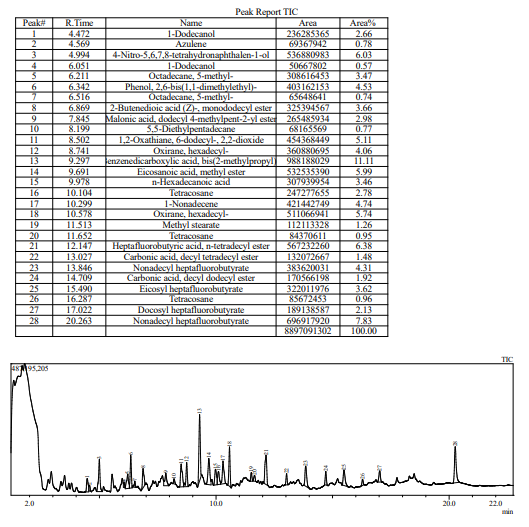

Supplement: Supplementary file 1 [file 83db9f1e8e236a9fe0d4f14c.docx]
